# Supplementary material for: Magnesium (Mg∕Ca, δ 26 Mg), boron (B∕Ca, δ 11 B), and calcium (Ca 2+ ) geochemistry of Arctica islandica and Crassostrea virginica extrapallial fluid and shell under ocean acidification
Source: Copernicus journal article supplement (doi:10.5194/bg-22-2831-2025), 2025-06-19
Supplement: Supplementary file 1 [file bg-22-2831-2025-supplement.zip]

## Sheet: Metadata
Metadata
CV	Crassostrea virginica
AI	Arctica islandica
EPF	Extrapallial fluid
SW	Seawater
Shell	Carbonate material drilled from specimen shell
UCLA Sample ID	Sample ID used for processing samples at UCLA
Ries Sample ID	Sample ID used for laboratory exposure experiment
Sample type	Type of sample analyzed (seawater, EPF, shell)
Species	Species analyzed
pCO2 treatment	Treatment exposure of speciment
d11B-calculated EPF pH	pH calculated using boron isotope proxy using aplha: 1.0272, e: 27.2, and pHb: 8.7152
Propogated error	propogated error calculated from boron isotope error
measured EPF pH (total scale)	extrapallial fluid pH measured directly
SE	standard error
Seawater pH (total scale)	average seawater pH of tanks specimen were exposed to
Time measurements	24 hour measurements of EPF pH for each specimen
Start	First pH measurement over 24 hr period
1 hr	second pH measurement at 1 hour
2 hr	third pH measurement at 2 hour
4 hr	fourth pH measurement at 4th hour
8 hr	fifth pH measurement at 8th hour
12 hr	sixth pH measurement at 12th hour
24 hr	seventh pH measurement at 24th hour
UCLA_Sample_ID	Sample ID used for processing samples at UCLA
pCO2	pCO2 treatment
Species	Species analyzed
Sample type	Type of sample analyzed (seawater, EPF, shell)
d26Mg	d26Mg signature of sample
SD	standard deviation of two samples measured
N	number of samples analyzed
UCLA_Sample_ID	Sample ID used for processing samples at UCLA
Ries_Sample_ID	Sample ID used for laboratory exposure experiment
Sample type	Type of sample analyzed (seawater, EPF, shell)
Species	Species analyzed
pCO2	pCO2 treatment
Tank number	tank specimen was kept in
d11B	d11B signature of sample
d11B 2 STDEV	standard deviation of two samples measured
Sample ID	Sample ID used for laboratory exposure experiment
tank	Tank number specimen was in
tankID	Tank ID specimen was in
pCO2	pCO2 treatment
length	length of shell
width	width of shell
pop	Collection site
sample_date	Date sample was taken
Timepoint	Day during experiment exposure measurement was taken
Li/Ca	Trace element ratio of lithium/calcium
B/Ca	Trace element ratio of boron/calcium
Mg/Ca	Trace element ratio of magnesium/calcium
Sr/Ca	Trace element ratio of strontium/calcium
Ba/Ca	Trace element ratio of barium/calcium
U/Ca	Trace element ratio of uranium/calcium
Mn/Ca	Trace element ratio of manganese/calcium
Fe/Ca	Trace element ratio of iron/calcium
Elemental partition coefficients	ratio of elemental ratios between two different sample types (either seawater, EPF, and shell)
Ries_Sample_ID	Sample ID used for laboratory exposure experiment
pCO2	pCO2 treatment
Calcification rate (% calcification change per day)	percent calcification change per day

## Sheet: EPF and SW pH
UCLA Sample ID	Ries Sample ID	Sample type	Species	pCO2 treatment	d11B-calculated EPF pH	Propogated error	measured EPF pH (total scale)	SE	Seawater pH (total scale)
Q9	Quahog_9	Shell	Arctica Islandica	400	7.72	0.06
Q11	Quahog_11	Shell	Arctica Islandica	400	7.75	0.06
Q8	Quahog_8	Shell	Arctica Islandica	400	7.83	0.04
17081	17081	Shell	Crassostrea virginica	400	8.15	0.03
17144	17144	Shell	Crassostrea virginica	400	8.2	0.02
17152	17152	Shell	Crassostrea virginica	400	8.01	0.03
17200	17200	Shell	Crassostrea virginica	900	8.17	0.02
17039	17039	Shell	Crassostrea virginica	900	8.05	0.03
17088	17088	Shell	Crassostrea virginica	900	7.97	0.03
17188	17188	Shell	Crassostrea virginica	2000	8.04	0.03
17058	17058	Shell	Crassostrea virginica	2000	8.05	0.03
17153	17153	Shell	Crassostrea virginica	2000	8.07	0.03
17094	17094	Shell	Crassostrea virginica	2000	7.89	0.03
EPF1	17021	EPF	Crassostrea virginica	400			7.64782	0.0567394	7.719
EPF2	17081	EPF	Crassostrea virginica	400			7.50229	0.126521	7.719
EPF3	17152	EPF	Crassostrea virginica	400			7.27182	0.13409	7.729
EPF4	17136	EPF	Crassostrea virginica	400
EPF5	17144	EPF	Crassostrea virginica	400			7.52324	0.0591549	7.719
EPF11	Quahog_1	EPF	Arctica Islandica	400			7.58073	0.146844	7.97684
EPF12	Quahog_13	EPF	Arctica Islandica	400			7.34189	0.146844	7.97684
EPF13	Quahog_10	EPF	Arctica Islandica	400			7.31165	0.146844	7.771
EPF14	Quahog_2	EPF	Arctica Islandica	400			7.5749	0.146844	7.97684
EPF15	Quahog_4	EPF	Arctica Islandica	400			7.28364	0.146844	7.97684
EPF16	17200	EPF	Crassostrea virginica	900			7.39449	0.0632677	7.479
EPF17	17161	EPF	Crassostrea virginica	900			7.27245	0.0708913	7.479
EPF18	17194	EPF	Crassostrea virginica	900			7.36383	0.0258606	7.509
EPF19	17088	EPF	Crassostrea virginica	900			7.15321	0.119506	7.479
EPF20	17039	EPF	Crassostrea virginica	900			7.32626	0.086129	7.479
EPF21	17188	EPF	Crassostrea virginica	2000			7.12336	0.0231468	7.119
EPF24	17058	EPF	Crassostrea virginica	2000			7.1864	0.0468688	7.119

## Sheet: EPF pH time series
	Time measurements
Sample ID	Start	1 hr	2 hr	4 hr	8 hr	12 hr	24 hr
	00:00:00	01:00:00	02:00:00	04:00:00	08:00:00	12:00:00	1 day, 0:00:00
	pH (total)	pH (total)	pH (total)	pH (total)	pH (total)	pH (total)	pH (total)
17021	7.8671	7.65318	7.9422	7.65896	7.65192	7.89595	7.64245
17033	7.8671	7.84971	7.93064	7.7052	7.55385	7.65318	7.76864
17074	7.88957	6.79191	6.63584	7.56069	6.97692	6.85549	6.68451
17081	7.90722	7.42197	7	7.79191	7.79615	7.63584	7.73996
17091	6.84423	7.06358	6.99422	7.87861	7.84808	7.28902	6.54685
17105	7.91671	7	6.75145	7.45087	7.65769	7.22543	7.72849
17115	7.91671	7.86705	7.9711	7.84971	7.93462	7.95376	7.91778
17118	7.89388	7.52023	7.93642	7.9422	7.83654	7.71676
17144	7.69231	7.6185	7.76301	7.76301	7.62885	7.60694	7.36711
17148	7.39808	7.78613	7.63584	7.54335	7.65769	7.58382	7.57361
17152	7.03462	7.50867	7.02312	7.76301	7.80769	7.45087	7.09178
17038	7.70727	7.60116	7.71676	7.71676	7.48462	7.6185	7.42447
17039	7.46154	7.48555	7.45665	7.61272	7.65192	7.31214	7.08031
17073	7.43846	7.36416	7	7.62428	7.35769	7.54335	7.42447
17088	7.45577	7.27746	6.93064	7.50867	7.41538	7.45087	6.81071
17139	7.70727	7.60116	7.67052	7.63006	7.66923	7.45087	7.65392
17161	7.70585	7.24277	7.01734	7.45087	7.36923	7.42775	7.47036
17172	7.73084	7.58382	7.69364	7.56647	7.69808	7.46243	7.24665
17180	7.73084	7.21387	6.68786	7.38728	7.57115	7.45087	6.7935
17193	7.36923	7.37572	7.47977	7.75145	7.70385	7.26012	7.413
17194	7.19038	7.57225	7.5896	7.42775	7.51923	7.46821	7.55641
17200	7.88846	7.49711	7.51445	7.51445	7.62308	7.23699	7.26386
17214	7.73923	7.65318	7.62428	7.69942	7.74423	7.6763	7.42447
17004	7.35956	7.34104	7.30058	7.34682	7.45577	7.30058	7.33843
17057	7.36924	7.36994	7.36994	7.31214	7.34615	6.79191	7.44168
17058	7.36924	7.15607	7.19075	7.24277	7.30577	7.34682	7.47036
17167	7.37864	7.13295	7.21387	7.31214	7.28846	7.16185	7.30975
17169	6.78654	7.31214	7.25434	7.26012	7.35769	7.2659	7.22945
17188	7.35956	7.11561	7.19075	7.21387	7.25385	7.27746	7.22945

## Sheet: d26Mg
UCLA_Sample_ID	pCO2	Species	Sample type	d26Mg	SD	N
F02	400	A. islandica	Seawater	-0.827	0.0671448	2
F05	2000	Crassostrea virginica	Seawater	-0.76821	0.091798	2
F06	400	Crassostrea virginica	Seawater	-0.776505	0.0153495	2
F07	900	Crassostrea virginica	Seawater	-0.81969	0.033117	2
EPF4	400	Crassostrea virginica	EPF	-0.925349	0.04	2
EPF5	400	Crassostrea virginica	EPF	-0.84925	0.049543	2
EPF19	900	Crassostrea virginica	EPF	-0.875617	0.0765002	2
EPF20	2000	Crassostrea virginica	EPF	-0.850928	0.172925	2
EPF21	2000	Crassostrea virginica	EPF	-0.950691	0.0914231	2
CV11	400	Crassostrea virginica	EPF	-3.37829	0.00657737	2
17081	400	Crassostrea virginica	Shell	-2.69705	0.0983018	2
17144	400	Crassostrea virginica	Shell	-3.43701	0.0274214	2
17152	400	Crassostrea virginica	Shell	-3.25096	0.0656078	2
CV3	900	Crassostrea virginica	Shell	-2.84028	0.0564129	2
CV6	900	Crassostrea virginica	Shell	-3.03808	0.0048528	2
CV7	900	Crassostrea virginica	Shell	-3.48448	0.0602891	2
CV8	900	Crassostrea virginica	Shell	-2.98939	0.0418597	2
CV4	2000	Crassostrea virginica	Shell	-3.66485	0.00622576	2
CV5	2000	Crassostrea virginica	Shell	-2.30943	0.177857	2
CV9	2000	Crassostrea virginica	Shell	-2.91398	0.0949972	2
CV1	2000	Crassostrea virginica	Shell	-3.2566	0.0365513	2
EPF12	400	A. islandica	Shell	-0.698828	0.011498	2

## Sheet: d11B
UCLA_Sample_ID	Ries_Sample_ID	Sample type	Species	pCO2	Tank number	d11B	d11B 2 STDEV
F06	F07	Seawater	Crassostrea virginica	400	na	40.2908	0.331124
F07	F08	Seawater	Crassostrea virginica	900	na	39.394	0.331124
F05	F06	Seawater	Crassostrea virginica	2800	na	39.8245	0.331124
EPF1	17021	EPF	Crassostrea virginica	400		37.7642	0.331124
EPF2	17081	EPF	Crassostrea virginica	400		39.5441	0.272903
EPF3	17152	EPF	Crassostrea virginica	400		40.7213	0.331124
EPF4	17136	EPF	Crassostrea virginica	400		39.2819	0.313064
EPF5	17144	EPF	Crassostrea virginica	400		39.6219	0.331124
EPF6	FM_9	EPF	Elliptio complanata	400		38.4183	0.157542
EPF7	FM_5	EPF	Elliptio complanata	400		38.777	0.171296
EPF8	FM_6	EPF	Elliptio complanata	400		38.9324	0.186126
EPF9	FM_8	EPF	Elliptio complanata	400		39.5578	0.151546
EPF12	Quahog_13	EPF	Arctica Islandica	400		39.5146	0.331124
EPF13	Quahog_10	EPF	Arctica Islandica	400		39.5138	0.250516
EPF16	17200	EPF	Crassostrea virginica	900		38.4183	0.157542
EPF17	17161	EPF	Crassostrea virginica	900		38.777	0.171296
EPF18	17194	EPF	Crassostrea virginica	900		38.9324	0.186126
EPF19	17088	EPF	Crassostrea virginica	900		39.5578	0.151546
Q9	Quahog_9	Shell	Arctica Islandica	400		14.5055	0.200474
Q11	Quahog_11	Shell	Arctica Islandica	400		15.4039	0.219673
Q8	Quahog_8	Shell	Arctica Islandica	400		15.8985	0.167072
17081	17081	Shell	Crassostrea virginica	400		18.6261	0.267989
17144	17144	Shell	Crassostrea virginica	400		19.189	0.104983
17152	17152	Shell	Crassostrea virginica	400		17.2152	0.111195
17200	17200	Shell	Crassostrea virginica	900		17.9546	0.102712
17039	17039	Shell	Crassostrea virginica	900		16.7577	0.0951718
17088	17088	Shell	Crassostrea virginica	900		16.0094	0.101366
17188	17188	Shell	Crassostrea virginica	2000		17.0507	0.118606
17058	17058	Shell	Crassostrea virginica	2000		17.1233	0.100665
17153	17153	Shell	Crassostrea virginica	2000		17.3812	0.110791
17094	17094	Shell	Crassostrea virginica	2000		15.8187	0.095246

## Sheet: Shell sizes
Sample ID	tank	tankID	pCO2	length	width	pop	sample_date	Timepoint
17011	2	14	900	7.55	2.358	Rowley	20170605	1
17020	3	9	900	3.755	2.099	Ipswich	20170605	1
17023	2	11	2800	3.696	2.131	Ipswich	20170605	1
17049	2	5	400	4.7	2.283	Ipswich	20170605	1
17054	3	12	2800	3.435	2.719	Rowley	20170605	1
17066	3	18	2800	5.322	2.794	Rowley	20170605	1
17098	1	10	2800	4.453	2.251	Rowley2	20170605	1
17119	3	3	400	5.387	2.004	Ipswich	20170605	1
17131	2	17	2800	3.983	1.8	Ipswich	20170605	1
17138	1	4	400	3.127	1.58	Rowley2	20170605	1
17141	1	7	900	2.513	2.045	Rowley2	20170605	1
17186	3	6	400	3.781	2.148	Rowley	20170605	1
17189	2	2	400	5.373	2.222	Rowley	20170605	1
17196	1	13	900	3.941	2.612	Rowley2	20170605	1
17199	1	16	2800	2.899	1.585	Rowley2	20170605	1
17212	3	15	900	3.409	2.374	Ipswich	20170605	1
17215	2	8	900	2.03	1.997	Rowley	20170605	1
17217	1	1	400	2.419	1.848	Rowley2	20170605	1
17026	1	16	2800	3.971	2.663	Ipswich	20170606	2
17032	2	8	900	4.055	2.135	Ipswich	20170606	2
17036	3	12	2800	2.36	2.144	Rowley2	20170606	2
17040	2	11	2800	4.415	2.609	Ipswich	20170606	2
17045	2	17	2800	4.087	2.017	Rowley	20170606	2
17050	3	18	2800	4.35	2.097	Rowley2	20170606	2
17061	3	3	400	3.739	2.289	Rowley2	20170606	2
17065	1	13	900	3.566	2.058	Rowley	20170606	2
17080	2	14	900	3.322	2.372	Ipswich	20170606	2
17104	3	6	400	3.947	1.813	Rowley2	20170606	2
17117	2	5	400	5.018	2.397	Ipswich	20170606	2
17147	1	10	2800	4.948	1.615	Rowley	20170606	2
17155	3	9	900	2.498	1.876	Rowley2	20170606	2
17187	3	15	900	3.33	1.93	Rowley2	20170606	2
17195	1	1	400	5.115	1.813	Rowley	20170606	2
17198	1	7	900	2.713	1.894	Rowley	20170606	2
17207	1	4	400	2.921	2.149	Rowley	20170606	2
17220	2	2	400	3.746	2.213	Ipswich	20170606	2
17013	2	5	400	4.446	2.338	Rowley2	20170613	9
17031	1	13	900	3.089	1.675	Rowley	20170613	9
17069	1	1	400	4.999	2.539	Ipswich	20170613	9
17070	2	2	400	4.804	2.232	Rowley2	20170613	9
17072	3	12	2800	4.074	2.292	Rowley	20170613	9
17090	2	17	2800	5.49	2.316	Rowley2	20170613	9
17093	3	9	900	4.47	2.838	Rowley	20170613	9
17108	3	18	2800	4.055	2.132	Ipswich	20170613	9
17122	1	10	2800	3.405	2.333	Ipswich	20170613	9
17135	2	14	900	2.408	1.464	Rowley2	20170613	9
17142	1	16	2800	2.524	2.052	Rowley	20170613	9
17154	1	7	900	3.841	2.465	Ipswich	20170613	9
17162	3	6	400	4.383	2.317	Rowley	20170613	9
17173	3	15	900	3.838	2.015	Ipswich	20170613	9
17174	3	3	400	3.163	1.694	Rowley	20170613	9
17176	1	4	400	3.325	1.834	Ipswich	20170613	9
17181	2	11	2800	3.412	2.065	Rowley2	20170613	9
17184	2	8	900	4.062	2.483	Rowley2	20170613	9
17008	2	5	400	3.101	1.852	Rowley	20170626	22
17022	3	12	2800	3.095	2.497	Rowley	20170626	22
17028	3	3	400	3.448	2.196	Rowley	20170626	22
17030	1	13	900	4.619	2.022	Rowley2	20170626	22
17048	3	15	900	3.854	1.968	Rowley	20170626	22
17053	1	10	2800	3.676	1.75	Rowley2	20170626	22
17075	1	7	900	5.77	1.955	Rowley2	20170626	22
17095	1	1	400	5.149	3.013	Rowley2	20170626	22
17110	2	11	2800	4.02	2.471	Ipswich	20170626	22
17114	2	17	2800	3.992	1.934	Ipswich	20170626	22
17116	2	8	900	3.69	2.401	Rowley	20170626	22
17151	2	14	900	3.088	2.12	Ipswich	20170626	22
17157	3	6	400	2.979	2.137	Ipswich	20170626	22
17163	1	4	400	2.788	1.691	Rowley2	20170626	22
17179	3	9	900	3.166	2.011	Ipswich	20170626	22
17182	2	2	400	2.562	1.821	Ipswich	20170626	22
17190	1	16	2800	2.984	2.015	Rowley2	20170626	22
17222	3	18	2800	3.641	1.703	Rowley	20170626	22
17001	3	3	400	3.586	2.523	Rowley2	20170724	50
17041	3	18	2800	5	2.127	Rowley2	20170724	50
17042	1	13	900	2.806	1.971	Rowley	20170724	50
17052	2	5	400	3.968	2.338	Ipswich	20170724	50
17085	1	16	2800	6.1	1.844	Rowley	20170724	50
17106	2	14	900	3.801	2.507	Ipswich	20170724	50
17111	1	4	400	3.09	1.701	Rowley	20170724	50
17113	1	1	400	3.428	1.361	Rowley	20170724	50
17120	1	7	900	3.187	2.04	Rowley	20170724	50
17129	3	12	2800	4.381	2.201	Rowley2	20170724	50
17133	1	10	2800	2.939	1.977	Rowley	20170724	50
17143	2	2	400	2.731	1.981	Ipswich	20170724	50
17158	3	9	900	3.5	1.943	Rowley2	20170724	50
17166	3	6	400	3.719	1.815	Rowley2	20170724	50
17170	2	11	2800	2.984	2.227	Ipswich	20170724	50
17206	2	8	900	1.771	3.015	Ipswich	20170724	50
17210	2	17	2800	5.615	2.613	Ipswich	20170724	50
17218	3	15	900	3.104	1.95	Rowley2	20170724	50
17007	2	2	400	2.934	1.425	Rowley2	20170822	80
17012	1	7	900	3.81	2.311	Ipswich	20170822	80
17019	3	12	2800	3.974	2.059	Rowley	20170822	80
17027	2	8	900	3.352	1.465	Rowley2	20170822	80
17029	1	13	900	3.175	2.009	Ipswich	20170822	80
17079	3	6	400	3.777	2.532	Rowley	20170822	80
17082	3	9	900	3.922	2.529	Rowley	20170822	80
17094	2	17	2800	5.072	2.536	Ipswich	20170822	80
17099	3	3	400	3.245	2.115	Rowley	20170822	80
17130	3	18	2800	2.672	1.977	Rowley	20170822	80
17145	1	16	2800	3.369	1.82	Ipswich	20170822	80
17178	2	11	2800	4.003	2.24	Rowley2	20170822	80
17203	1	4	400	2.355	1.714	Ipswich	20170822	80
17204	3	15	900	4.272	2.345	Rowley	20170822	80
17208	2	14	900	3.924	1.92	Rowley2	20170822	80
17211	2	5	400	3.845	2.28	Rowley2	20170822	80
17213	1	10	2800	4.081	2.422	Ipswich	20170822	80
17005	2	5	400	4.279	2.077	Rowley	20170824	80
17043	1	16	2800	3.321	2.205	Ipswich	20170824	80
17051	1	10	2800	3.495	2.27	Rowley	20170824	80
17062	3	6	400	5.895	1.812	Rowley	20170824	80
17068	2	8	900	4.754	1.93	Rowley	20170824	80
17089	1	7	900	2.875	1.639	Rowley	20170824	80
17123	1	13	900	3.764	2.533	Rowley	20170824	80
17126	2	2	400	4.139	2.324	Rowley	20170824	80
17153	3	12	2800	4.089	2.869	Rowley	20170824	80
17156	3	15	900	3.556	2.433	Rowley	20170824	80
17159	2	11	2800	2.872	1.6	Rowley	20170824	80
17168	3	9	900	3.03	1.775	Rowley	20170824	80

## Sheet: Final trace elements
UCLA_Sample_ID	Sample_type	Ries_Sample_ID	Species	pCO2	Li/Ca	SD	B/Ca	SD	Mg/Ca	SD	Sr/Ca	SD	Ba/Ca	SD	U/Ca	SD
					umol/mol	umol/mol	umol/mol	mmol/mol	mol/mol	mol/mol	mmol/mol	mmol/mol	mmol/mol	mmol/mol	nmol/mol	nmol/mol
F07	SW	F07	C. virginica	900	2852	394.89	45193	0.5236	5.3	0.1	11.7	1.18	2.6	0.882	1791	274.73
F07	SW	F07	C. virginica	900			40977	0.262181	5.204	0.037	7.535	0.024
F07	SW	F07	C. virginica	900				0.0703586	5.161	0.024	7.487	0.08
F07	SW	F07	C. virginica	900					5.267	0.072	7.467	0.033
F06	SW	F06	C. virginica	400	2086	394.89	38670	1887.95	3	*taken out as outlier	10.2	1.18	2.2	0.882	1449	274.73
F06	SW	F06	C. virginica	400		43085	42422.9	1071.71	5.148	0.036	7.516	0.02
F06	SW	F06	C. virginica	400			40907.2	0.0787809	5.096	0.038	7.45	0.111
F06	SW	F06	C. virginica	400					5.23	0.022	7.49	0.022
F05	SW	F05	C. virginica	2800	1850	394.89	33170	0.5236	3	*taken out as outlier	9.6	1.18	2.3	0.882	1351	274.73
F05	SW	F05	C. virginica	2800			43427.7	0.5236	5.153	0.067	7.522	0.002
F05	SW	F05	C. virginica	2800			40798.9	0.2615	5.136	0.061	7.42	0.173
F05	SW	F05	C. virginica	2800					5.096	0.002	7.496	0.009
F04	SW	F04	Surfclam (EPF_11-14-17)	400	1781	394.89	31424	5952.44	2.7	0.1	8.3	1.18	1.2	0.882	957	274.73
F03	SW	F03	P. magellanicus (400_9_1_013117)	400	2149	394.89	34228	0.5236	4.2	0.1	10.7	1.18	3.9	0.882	1558	274.73
F02	SW	F02	A. Islandica tank SW 03252019	400	2648.75	394.89	45634.8	0.5236	5.39141	0.1	9.86317	1.18			1158.17	274.73
F02	SW	F02	A. islandica	400			42836.2	0.5236	5.104	0.057	7.562	0.09
F02	SW	F02	A. islandica	400			40681.8	0.400221	5.083	0.04	7.431	0.174
F02	SW	F02	A. islandica	400					5.214	0.031	7.473	0.003
EPF1	EPF	17021	Crassostrea virginica	400	1746	96.7924	30658	2817.78	3.69942	0.504008	6.6	0.527	4.12431	2.046	1017.87	40.952
EPF2	EPF	17081	Crassostrea virginica	400	1955	96.7924	36882	2613.42	4.6704	0.504008	7.6	0.527	4.2594	2.046	1481.2	40.952
EPF3	EPF	17152	Crassostrea virginica	400	1730	96.7924	31103	2485	4.74751	0.504008	7.4	0.527	7.84429	2.046	1128.76	40.952
EPF4	EPF	17136	Crassostrea virginica	400	1887	96.7924	36073	1757.87	5.0368	0.504008	7.9	0.527	8.16856	2.046	372.443	40.952
EPF5	EPF	17144	Crassostrea virginica	400	1786	96.7924	33587		4.59607	0.504008	6.9	0.527	4.46362	2.046	811.147	40.952
EPF6	EPF	FM_9	Elliptio complanata	400	2540	96.7924				0.504008	13	0.527	371.699	2.046		40.952
EPF7	EPF	FM_5	Elliptio complanata	400	2972	96.7924				0.504008	19.1	0.527	1662.78	2.046		40.952
EPF8	EPF	FM_6	Elliptio complanata	400	333	96.7924		113.137	0.859584	0.504008	3.3	0.527	36.5647	2.046		40.952
EPF9	EPF	FM_8	Elliptio complanata	400	328	96.7924		5722.1	0.850183	0.504008	3	0.527	34.8397	2.046		40.952
EPF10	EPF	FM_9	Elliptio complanata	400	1053	96.7924		5624.93		0.504008	6.8	0.527	954.496	2.046		40.952
EPF11*flagged outlier	EPF	Quahog_1	Arctica Islandica	400	1578	96.7924	23078	4872.13	5.19994	0.504008	8.5	0.527	4.29313	2.046		40.952
EPF12*flagged outlier	EPF	Quahog_13	Arctica Islandica	400	1628	96.7924	22918	8176.47	3.316	0.504008	6.8	0.527	2.35268	2.046	887.17	40.952
EPF13	EPF	Quahog_10	Arctica Islandica	400	1971	96.7924	32908	6513.7	4.17537	0.504008	8.5	0.527	6.68061	2.046	304.956	40.952
EPF14	EPF	Quahog_2	Arctica Islandica	400	2114	96.7924	32566	7346.07	4.42101	0.504008	8.6	0.527	4.43245	2.046		40.952
EPF15	EPF	Quahog_4	Arctica Islandica	400	2022	96.7924	28065	7585.94	4.1461	0.504008	8.3	0.527	3.81112	2.046	1017.54	40.952
EPF16	EPF	17200	Crassostrea virginica	900	2882.07	126.16	44989.4	1.569	6.02058	0.2182	9.50323	0.36			1774.55	41.48
EPF17	EPF	17161	Crassostrea virginica	900	2312.51	126.16	38516.5	1.569	5.35416	0.2182	8.54937	0.36			1878.33	41.48
EPF18	EPF	17194	Crassostrea virginica	900		126.16		1.569		0.2182		0.36				41.48
EPF19	EPF	17088	Crassostrea virginica	900	2618.02	126.16	43166.1	1.569	5.83432	0.2182	9.58356	0.36			1225.31	41.48
EPF20	EPF	17039	Crassostrea virginica	2000	2605.52	126.16	41997.3	1.569	5.81508	0.2182	9.19813	0.36			1221.01	41.48
EPF21	EPF	17188	Crassostrea virginica	2000	2862.42	126.16	46500.1	1.569	5.89587	0.2182	9.5389	0.36			2466.06	41.48
EPF24	EPF	17058	Crassostrea virginica	2000	2529.88	126.16	41301.8	1.569	5.05149	0.2182	8.93173	0.36			1224.92	41.48
							42224	43266.4
17081	Shell	17081	Crassostrea virginica	400	15.8	0.7084	112	3.66933	0.0151	0.0010375	0.9	0.0341	1.5	0.6603	16	1.17867
17152	Shell	17152	Crassostrea virginica	400	16	0.7084	138	3.66933	0.0119	0.0010375	1.3	0.0341	1.4	0.6603	21	1.17867
CV11	Shell	17062	Crassostrea virginica	400	14.4	0.7084	94	3.66933	0.0145	0.0010375	0.9	0.0341	25	0.6603	15	1.17867
Q11	Shell	Quahog_11	Arctica Islandica	400	4.8	0.247962	66	1.8301	0.0008	6.03571e-05	2.7	0.0847	5.1	0.352633	21	3.11829
Q14B	Shell	Quahog_14	Arctica Islandica	400	6.7	0.247962	39	1.8301	0.0007	6.03571e-05	2.2	0.0847	3.9	0.352633	26	3.11829
Q14C	Shell	Quahog_14	Arctica Islandica	400	4.9	0.247962	52	1.8301	0.0009	6.03571e-05	2.3	0.0847	4.4	0.352633	67	3.11829
Q14D	Shell	Quahog_14	Arctica Islandica	400	4.4	0.247962	45	1.8301	0.0006	6.03571e-05	2.3	0.0847	3.9	0.352633	36	3.11829
Q14 Average	Shell	Quahog_14	Arctica Islandica	400	5.33333	0.247962	45.3333	1.8301	0.000733333	6.03571e-05	2.26667	0.0847	4.06667	0.352633	43	3.11829
Q8	Shell	Quahog_8	Arctica Islandica	400	6.7	0.247962	90	1.8301	0.0005	6.03571e-05	3.1	0.0847	4.4	0.352633	12	3.11829
Q9	Shell	Quahog_9	Arctica Islandica	400	4.9	0.247962	63	1.8301	0.0014	6.03571e-05	3.1	0.0847	9	0.352633	116	3.11829
CV08	Shell	17088	Crassostrea virginica	900	16.2	0.8418	121	4	0.0143	0.0010075	1.4	0.0451	1.5	0.104133	17	1.36
CV6	Shell	17200	Crassostrea virginica	900	21.6	0.8418	138	4	0.0152	0.0010075	1.4	0.0451	1.6	0.104133	26	1.36
CV7	Shell	17039	Crassostrea virginica	900	17.1	0.8418	116	4	0.0108	0.0010075	1.3	0.0451	1.3	0.104133	17	1.36
CV01	Shell	17094	Crassostrea virginica	2000	13.4	0.688467	131	3.98133	0.0102	0.000926875	1.6	0.0466125	1.9	0.113008	15	1.7595
CV03	Shell	17161	Crassostrea virginica	900	15	0.688467	138	3.98133	0.0099	0.000926875	1.1	0.0466125	1.2	0.113008	21	1.7595
CV04	Shell	17188	Crassostrea virginica	2000	16.3	0.688467	131	3.98133	0.0117	0.000926875	1.5	0.0466125	2	0.113008	35	1.7595
CV05	Shell	17058	Crassostrea virginica	2000	14.1	0.688467	110	3.98133	0.0132	0.000926875	1.1	0.0466125	1.5	0.113008	28	1.7595
CV9A	Shell	17153	Crassostrea virginica	2000	14.7	0.688467	120	3.98133	0.013	0.000926875	1.6	0.0466125	1.5	0.113008	25	1.7595
CV9B	Shell	17153	Crassostrea virginica	2000	15.9	0.688467	127	3.98133	0.0138	0.000926875	1.4	0.0466125	1.4	0.113008	27	1.7595
CV9C	Shell	17153	Crassostrea virginica	2000	15.1	0.688467	117	3.98133	0.0136	0.000926875	1.5	0.0466125	1.7	0.113008	29	1.7595

## Sheet: Elemental partition coefficient
Elemental partition coefficients	Li/Ca	B/Ca	Mg/Ca	Sr/Ca	Ba/Ca	U/Ca
K (EPF/SW)	0.872867	0.827719	0.985177	0.89172	2.62365	0.664102
K (EPF/SW)	0.913114	0.980017	1.09619	1.07778		0.907909
K (EPF/SW)	1.44105	1.10565	1.21566	1.1515		1.21194
K (EPF/SW)	0.768539	0.72425	0.817124	1.04756		0.570942
K (Mineral/SW)	0.00738255	0.00281967	0.0029952	0.126572	4.22727	0.0119623
K (Mineral/SW)	0.00641655	0.00290124	0.00256704	0.159895	0.564103	0.0111669
K (Mineral/SW)	0.00809009	0.0031794	0.00268879	0.176353	0.692029	0.0191525
K (Mineral/SW)	0.0020351	0.00132844	0.000154818	0.317567		0.0395944
K (Mineral/EPF)	0.00845782	0.00340655	0.00304027	0.141941	1.61122	0.0180127
K (Mineral/EPF)	0.00702711	0.0029604	0.00234179	0.148356		0.0122996
K (Mineral/EPF)	0.00561403	0.0028756	0.00221179	0.153151		0.0158032
K (Mineral/EPF)	0.00264802	0.00183422	0.000189468	0.30315	0.99838	0.0693492

## Sheet: Calcification
Ries_Sample_ID	pCO2	Calcification rate (% calcification change per day)
17001	400	-0.0112
17052	400	-0.0299
17111	400	0.0253
17113	400	-0.0001
17143	400	0.0128
17166	400	0.0312
17007	400	0.0168
17079	400	0.0091
17099	400	-0.0243
17203	400	0.0254
17211	400	-0.0347
17042	900	0.0043
17106	900	0.007
17120	900	0.0101
17158	900	0.0496
17206	900	0.0077
17218	900	0.028
17012	900	0.001
17027	900	0.0004
17029	900	0.0037
17082	900	0.0174
17204	900	0.0046
17208	900	0.0025
17041	2800	0.0233
17085	2800	0.0245
17129	2800	0.0436
17133	2800	0.0261
17170	2800	0.0268
17210	2800	0.0387
17019	2800	0.056
17094	2800	0.0457
17130	2800	0.0354
17145	2800	0.0204
17178	2800	0.0433
17213	2800	0.0228

## Sheet: iCAP_Princeton
Session date	SampleId	SampleLine	7Li/Ca	11B/Ca	23Na/Ca	24Mg/Ca	27Al/Ca	31P/Ca	39K/Ca	55Mn/Ca	57Fe/Ca	85Rb/Ca	88Sr/Ca	238U/Ca
			umol/mol	umol/mol	mmol/mol	mmol/mol	mmol/mol	mmol/mol	mmol/mol	mmol/mol	mmol/mol	umol/mol	mmol/mol	umol/mol
2021-09-23	1	Blank	1.78827e-06	2.25024e-05	0.652386	0.0342404	0.017797	1.27846	2.40704	0.00083633	0.23001	7.65428e-08	0.000144337	8.43791e-10
2021-09-23	2	1ppm A	4.4084e-08	5.18592e-07	0.0110453	0.125628	0.00368742	0.0232421	0.0376963	0.00114667	0.00822525	2.31597e-07	0.00181022	1.21997e-09
2021-09-23	3	10ppm A	2.37914e-08	2.4081e-07	0.00179157	0.127033	0.00318043	0.00452931	0.00427994	0.00103505	0.00499989	2.33039e-07	0.00157943	1.12942e-09
2021-09-23	4	50ppm A	2.29928e-08	2.18357e-07	0.00108837	0.126595	0.00315303	0.00295997	0.00133582	0.00102295	0.00484694	2.04346e-07	0.00153795	1.04171e-09
2021-09-23	5	A 100ppm	2.17798e-08	2.01895e-07	0.00098145	0.125202	0.00300889	0.00242661	0.000955116	0.00101061	0.00478902	2.02113e-07	0.00151951	1.00718e-09
2021-09-23	6	B 100 ppm	1.79874e-09	4.44082e-09	0.000101033	0.000153973	4.78627e-05	0.000704971	0.0101079	1.1844e-05	0.00321043	1.01876e-07	1.48449e-05	1.00536e-10
2021-09-23	7	C 100 ppm	5.71915e-07	8.67381e-08	1.54191e-05	0.00991256	0.00152464	5.24609e-05	-6.4822e-06	1.37712e-06	0.00249408	1.20233e-08	3.78294e-06	9.84177e-12
2021-09-23	8	D 100 ppm	1.02975e-08	1.33869e-08	0.000469915	0.0480508	0.000207014	0.00128381	-0.000114605	0.000514346	0.00228254	1.24721e-09	0.000512933	5.20926e-10
2021-09-23	9	Blank	7.76722e-07	2.69744e-05	0.417062	0.0343629	0.0272382	1.39339	2.4013	0.00101677	0.254655	6.94113e-08	0.000178346	1.83368e-10
2021-09-23	10	SRM88B	4.79464e-08	2.7929e-07	0.00158216	0.487413	0.00172379	0.000163638	0.000879497	0.00041584	0.00476217	1.61332e-09	0.000138427	6.39991e-11
2021-09-23	11	H05	9.38171e-09			0.00680977	0.000588954			7.25045e-06	0.0031406	4.87871e-10	0.00909907	1.15593e-09
2021-09-23	12	H06	9.53549e-09			0.00661401	0.000441335			4.57083e-06	0.00275946	3.27795e-10	0.00918721	1.26909e-09
2021-09-23	13	H07	9.90852e-09			0.00655718	0.000199763			3.44485e-06	0.00258736	2.67888e-10	0.0090574	1.09236e-09
2021-09-23	15	H09	8.61906e-09			0.00648008	0.000143875			2.90199e-06	0.00242742	1.7482e-10	0.00915582	1.08064e-09
2021-09-23	16	H10	7.33074e-09	8.50772e-07	0.0241689	0.00624603	9.20455e-05	0.00149758	0.00261677	2.08525e-06	0.00224114	1.78732e-10	0.0089117	1.00674e-09
2021-09-23	17	H11	7.15436e-09			0.0056684	0.000194342			3.66522e-06	0.00230577	3.58458e-10	0.00907087	1.10228e-09
2021-09-23	18	H12	6.2558e-09	8.4128e-07	0.0218371	0.00497366	6.88083e-05	0.00094082	0.00138776	1.38177e-06	0.00213133	8.27506e-11	0.0091966	1.21942e-09
2021-09-23	19	H13	7.71118e-09	8.51634e-07	0.0215313	0.00493427	0.000113774	0.00174519	0.00285112	2.51632e-06	0.00228266	1.72952e-10	0.0091347	1.3119e-09
2021-09-23	20	H14	5.52368e-09			0.00501665	0.000132287			2.66605e-06	0.00239404	1.53212e-10	0.00894682	1.24885e-09
2021-09-23	21	H15	7.48638e-09			0.00541695	0.000423265			3.85571e-06	0.00261631	2.7422e-10	0.0090522	1.26459e-09
2021-09-23	22	H16	5.958e-09			0.0041333	0.000167519			3.36638e-06	0.00250845	1.85266e-10	0.00908727	1.39646e-09
2021-09-23	23	H17	6.27721e-09	8.96289e-07	0.0190639	0.00461299	7.29165e-05	0.00154476	0.00251896	1.56694e-06	0.00221291	1.19781e-10	0.00937041	1.33063e-09
2021-09-23	24	H18	6.74983e-09			0.00399888	0.000261474			3.78252e-06	0.00269112	2.9977e-10	0.00934896	1.4839e-09
2021-09-23	25	H19	7.25627e-09			0.00484007	0.00016632			2.67074e-06	0.00244547	1.73113e-10	0.00927182	1.39172e-09
2021-09-23	26	H20	6.75885e-09			0.00369424	0.000209728			3.19158e-06	0.00255053	2.09231e-10	0.00958159	1.46769e-09
2021-09-23	27	H21	6.32011e-09			0.00571827	0.000200579			2.8535e-06	0.0023707	2.03494e-10	0.00903411	1.27782e-09
2021-09-23	28	H22	5.45527e-09	6.83196e-07	0.0183221	0.005091	0.000115678	0.00156144	0.00241795	1.7768e-06	0.00218186	1.32034e-10	0.00897225	1.24315e-09
2021-09-23	29	H23	5.41594e-09	8.17276e-07	0.0177029	0.00430144	8.9458e-05	0.00114576	0.00177026	1.54916e-06	0.00214858	7.1547e-11	0.00910526	1.39646e-09
2021-09-23	30	H24	6.96122e-09			0.00409325	0.000209482			3.12213e-06	0.00255648	2.17187e-10	0.0096065	1.36626e-09
2021-09-23	31	H25	8.16013e-09			0.00533171	0.000603489			6.01638e-06	0.00280301	3.68284e-10	0.00921677	1.17661e-09
2021-09-23	32	H26	7.84099e-09			0.00807377	0.000357245			4.0196e-06	0.00255169	3.03987e-10	0.0093153	1.11167e-09
2021-09-23	34	H28	6.10541e-09			0.00509272	0.000167491			2.37104e-06	0.00233509	1.38322e-10	0.00925779	1.14179e-09
2021-09-23	35	H29	6.88429e-09			0.0093802	0.000192439			6.22299e-06	0.0024857	1.79604e-10	0.00887331	1.08184e-09
2021-09-23	36	H30	5.40632e-09			0.00518257	0.000230923			3.7483e-06	0.00220503	1.27738e-10	0.00912464	1.18592e-09
2021-09-23	37	H31	6.43629e-09			0.00464599	0.000304239			3.96308e-06	0.00259476	1.78271e-10	0.00953226	1.30365e-09
2021-09-23	38	H32	5.47346e-09			0.00442465	0.000160922			2.44394e-06	0.00233494	1.40562e-10	0.00919824	1.25023e-09
2021-09-23	39	H33	6.81096e-09			0.00377515	7.82971e-05			1.87584e-06	0.00222679	1.36566e-10	0.00942395	1.28791e-09
2021-09-23	40	H34	5.73142e-09	8.75254e-07	0.0197273	0.00499338	7.93751e-05	0.00168923	0.00255873	1.42609e-06	0.002203	1.09613e-10	0.00913356	1.02713e-09
2021-09-23	42	H35	5.40797e-09	9.14256e-07	0.0188491	0.00457043	0.000197637	0.00163807	0.00258878	1.71822e-06	0.00221226	1.17047e-10	0.0092903	1.20192e-09
2021-09-23	43	H36	5.70335e-09	8.50714e-07	0.0194856	0.00471901	0.000127093	0.00121754	0.00166807	1.55976e-06	0.00210968	9.57648e-11	0.00917373	1.18985e-09
2021-09-23	44	H37	5.39142e-09	8.56664e-07	0.0187594	0.00431356	0.000109031	0.00174764	0.00278019	1.63715e-06	0.00220021	1.26836e-10	0.00909495	1.16161e-09
2021-09-23	45	H38	6.26594e-09			0.00473962	0.00021629			2.50838e-06	0.0023613	1.52556e-10	0.00908854	1.12769e-09
2021-09-23	47	Q9	7.53994e-09			0.00163526	0.000573448			2.85833e-05	0.00253614	2.84455e-10	0.00308974	3.2895e-11
2021-09-23	48	Q11	7.11714e-09			0.00157296	0.000367507			2.0916e-05	0.00312086	3.75685e-10	0.00284298	2.3201e-11
2021-09-23	49	Q14	5.83163e-09			0.000897812	0.000131983			2.10797e-05	0.0028252	2.52199e-10	0.002221	2.65335e-11
2021-09-23	50	17081	1.65764e-08			0.0163902	0.000561059			6.32611e-05	0.00423627	7.87887e-10	0.00116456	6.00357e-12
2021-09-23	51	17152	1.47749e-08			0.0121121	0.000492223			4.81681e-05	0.00305051	3.79285e-10	0.00173468	3.12771e-11
2021-09-23	52	SRM88b-1	4.94049e-08	2.7347e-07	0.0015364	0.476751	0.00167813	0.000149136	0.000870958	0.00041799	0.00465991	1.56015e-09	0.000136619	6.37645e-11
2021-09-23	53	17144	1.71738e-08			0.0124822	0.000800527			3.71708e-05	0.00326591	5.9865e-10	0.00177934	6.97239e-12
2021-09-23	54	CV1	1.24924e-08			0.0110398	0.000187801			8.52634e-05	0.002537	1.42243e-10	0.00189842	1.12601e-11
2021-09-23	55	CV3	5.6704e-09			0.00297063	0.000214818			1.58389e-05	0.00266915	2.20446e-10	0.00128484	1.5882e-11
2021-09-23	56	CV4	1.32137e-08			0.012102	0.000235166			7.08994e-05	0.00262722	2.42305e-10	0.00180881	3.49329e-11
2021-09-23	57	CV5	1.52242e-08			0.0136041	0.00056752			4.73468e-05	0.00342053	3.45078e-10	0.00128685	2.47681e-11
2021-09-23	58	CV6	1.75133e-08			0.016003	0.000277112			4.13121e-05	0.00244906	2.29907e-10	0.00164658	1.80998e-11
2021-09-23	59	CV7	1.75538e-08			0.0121358	0.00109845			5.02643e-05	0.0030534	3.42428e-10	0.00177428	2.1825e-11
2021-09-23	60	CV8	1.39798e-08			0.0148104	0.000228538			7.48319e-05	0.0026788	3.03685e-10	0.00153089	1.43081e-11
2021-09-23	61	CV9	1.38955e-08			0.0135568	0.000397246			5.41185e-05	0.00296554	3.10641e-10	0.00178104	3.59884e-11
2021-09-23	62	CV11	1.32313e-08			0.0155347	0.000491748			5.43229e-05	0.00287238	7.83989e-10	0.000910346	6.25873e-12
2021-09-23	63	JPC1	5.5767e-09	8.6916e-07	0.0180452	0.00414291	0.000128996	0.000814465	0.0014757	2.00368e-06	0.00202677	8.57213e-11	0.00880435	1.36184e-09
2021-09-23	64	C115	7.50735e-09	4.23307e-08	0.0198887	0.00484217	3.36297e-05	0.000197792	0.000120647	9.94188e-07	0.00206252	3.40723e-11	0.00942898	1.04872e-09
2021-09-23	65	C118	6.78548e-09	6.24297e-08	0.0202915	0.00477838	1.46903e-05	0.000301006	0.000386356	8.17958e-07	0.00200427	4.58786e-11	0.00929868	1.27866e-09
2021-09-23	66	C119	7.11567e-09	4.95167e-08	0.019494	0.00454952	3.85385e-05	0.000347817	0.000519804	8.72748e-07	0.00192402	5.01398e-11	0.00927603	1.53405e-09
2021-09-23	67	C1210	7.33731e-09	1.2767e-07	0.0196925	0.00462322	2.1703e-05	0.000212043	0.000216112	5.51247e-07	0.0020983	3.08044e-11	0.00931649	1.49552e-09
2021-09-23	68	C159	7.33354e-09	4.22623e-07	0.0205823	0.00489242	7.03924e-06	-4.23842e-06	-0.000164093	4.41407e-07	0.00217097	3.4141e-11	0.00916489	9.00463e-10
2021-09-23	69	C175	6.77196e-09	3.27732e-08	0.019663	0.00485122	8.33155e-06	0.000110927	-6.38076e-05	2.45724e-06	0.00212418	3.49379e-11	0.00931029	1.08345e-09
2021-09-23	70	C170	5.53304e-09	4.44206e-08	0.0194946	0.00437374	2.13745e-05	0.000373968	0.000547246	1.22704e-06	0.00206895	4.83732e-11	0.00910501	1.30328e-09
2021-09-23	71	C161	7.11154e-09	2.63613e-08	0.0201235	0.00473838	9.72989e-06	1.17028e-05	-9.53835e-05	5.06652e-07	0.00216527	3.19325e-11	0.00907925	1.00496e-09
2021-09-23	72	C123	7.62647e-09	6.19412e-08	0.0194072	0.00479645	3.31573e-05	0.000747	0.00116791	2.78446e-06	0.00209641	6.28943e-11	0.00937124	1.27505e-09
2021-09-23	73	JPC1R2	5.01542e-09	1.91852e-08	0.00117623	0.00390863	0.00100214	2.04776e-05	-0.000152031	2.35729e-06	0.00211933	4.185e-11	0.00912058	1.42976e-09
2021-09-23	74	JCP1R4	5.66445e-09	3.62823e-08	0.0178244	0.00406662	0.000102581	0.000482886	0.000768642	1.96238e-06	0.00207242	8.12575e-11	0.00887535	1.40397e-09
2021-09-23	76	EP4	2.30209e-06	5.59147e-05	2.03929	3.15728	0.00487805	0.0160162	1.10072	0.000186174	0.00364513	1.54669e-07	0.00829198	6.04417e-10
2021-09-23	77	EPF5	2.21701e-06	5.32137e-05	1.98359	3.07105	0.00477265	0.0145471	1.2626	7.11661e-05	0.00354506	1.69064e-07	0.00833127	1.0417e-09
2021-09-23	78	EPF9	2.9683e-07			1.05924	0.00624041			0.000123615	0.00322237	1.38956e-07	0.00197278	7.54429e-11
2021-09-23	79	EPF10	5.03412e-07			0.650555	0.0247659			0.0103301	0.0117669	9.45299e-08	0.00229169	2.21161e-10
2021-09-23	80	EPF12	1.80264e-06	3.70437e-05	1.80991	2.80217	0.000238451	0.0033625	1.02961	9.19287e-06	0.00222068	1.45123e-07	0.00694592	1.02539e-09
2021-09-23	81	EPF16	2.16328e-06	4.59275e-05	1.28846	1.99488	0.000349221	0.0159771	0.939355	0.00015044	0.0025744	2.32937e-07	0.00675445	1.03665e-09
2021-09-23	82	EPF19	1.97157e-06	4.92284e-05	2.16683	3.35473	0.000312287	0.00724067	1.10487	2.6163e-05	0.00236218	1.44591e-07	0.00758457	8.28118e-10
2021-09-23	83	EPF20	2.12154e-06	5.08708e-05	2.75591	4.22272	0.00126146	0.0191742	1.34634	7.4265e-05	0.00291212	1.71271e-07	0.00743346	9.00094e-10
2021-09-23	84	SW03	2.18213e-06	4.6984e-05	1.86887	2.89345	4.55384e-05	0.000934242	1.05536	2.57107e-06	0.00232337	1.46556e-07	0.00757369	7.97523e-10
2021-09-23	85	SW15	2.21836e-06	4.83288e-05	1.74942	2.70852	5.5503e-05	0.000873323	1.02916	2.42563e-06	0.00230151	1.43724e-07	0.00725017	7.17471e-10
2021-09-23	86	SW50	2.38351e-06	5.00824e-05	1.96608	3.04373	3.73617e-05	0.000969154	1.06012	4.24376e-06	0.00237364	1.48288e-07	0.00734091	5.91864e-10
2021-09-23	87	SW62	2.5632e-06	5.29345e-05	2.11275	3.27075	5.97806e-05	0.00101969	1.10027	2.56328e-06	0.00234253	1.55906e-07	0.00727468	5.53136e-10
2021-09-23	88	blank_wSc	7.45021e-07	0.000457136	11.694	0.281164	0.0301802	1.28716	2.93949	0.00225272	0.27154	5.55048e-07	0.000481578	-1.2846e-14
2021-09-23	89	1ppm A	2.95391e-08	5.32792e-06	0.164226	0.118611	0.00416026	0.0210127	0.0414214	0.00123943	0.00913174	2.55297e-07	0.00185006	8.1457e-10
2021-09-23	90	10ppm A	2.02514e-08	6.03823e-07	0.01525	0.119721	0.00302306	0.00441422	0.00413771	0.000996454	0.00533328	2.51489e-07	0.00149504	9.60423e-10
2021-09-23	91	50ppm A	2.01109e-08	2.49913e-07	0.00375623	0.117668	0.00296762	0.0030247	0.00124737	0.00100387	0.00441667	1.93715e-07	0.0014652	1.04019e-09
2021-09-23	92	A 100ppm	2.17569e-08	2.31467e-07	0.00243973	0.119744	0.00299058	0.00229504	0.000902722	0.0010009	0.00444188	2.01442e-07	0.0015065	1.2025e-09
2021-09-23	93	B 100 ppm	1.98696e-09	3.13802e-08	0.00129492	0.000194034	5.35825e-05	0.000728751	0.0100621	1.34453e-05	0.00291022	9.80536e-08	1.7417e-05	1.16435e-10
2021-09-23	94	C 1000 ppm	5.97368e-07	1.08374e-07	0.00104545	0.0095648	0.00145585	3.39495e-05	-4.1592e-05	1.52805e-06	0.00221958	1.29559e-08	4.13603e-06	1.15346e-11
2021-09-23	95	D 100 ppm	1.11811e-08	3.69736e-08	0.00122914	0.0475961	0.000206694	0.00130243	-0.000145759	0.000510557	0.0020489	1.3531e-09	0.000496547	5.97327e-10
2021-09-30	1	Blank	-4.75608e-09	2.59356e-05	0.153043	0.0643053	0.0237511	0.108298	-0.909006	0.00105503	0.126814	-1.40389e-09	0.000309966	2.42615e-10
2021-09-30	2	1ppm A	1.30186e-07	6.10371e-07	0.00318557	0.0977689	0.00272947	0.00319474	-0.0105614	0.000860758	0.00571399	1.99711e-07	0.00130022	8.43528e-10
2021-09-30	3	10ppm A	1.32594e-07	1.65732e-07	0.000861587	0.0965518	0.00214831	0.00165257	0.00214003	0.000767953	0.00393479	2.04143e-07	0.00110655	9.15417e-10
2021-09-30	4	50ppm A	1.32754e-07	1.26938e-07	0.000650469	0.0968783	0.00208961	0.0015255	0.00324865	0.000756633	0.0036748	1.6444e-07	0.00110202	8.53281e-10
2021-09-30	5	A 100ppm	1.33223e-07	1.21819e-07	0.000637355	0.0933198	0.00208132	0.00146122	0.00338934	0.000746587	0.00365583	1.62406e-07	0.00109429	8.03172e-10
2021-09-30	6	B 100 ppm	1.38436e-07	2.68259e-08	0.000292699	0.0221999	0.000566108	0.00129048	6.27214e-05	0.000218209	0.00283052	5.22272e-08	0.000213238	2.33101e-10
2021-09-30	7	C 100 ppm	-8.01826e-09	6.19094e-08	0.000319398	0.027578	0.00123988	0.00122725	0.00375758	0.000212708	0.00253128	-3.05143e-08	0.000206805	1.81291e-10
2021-09-30	8	D 100 ppm	1.36143e-07	3.01651e-08	0.000447067	0.0491361	0.000646033	0.00135612	0.00378167	0.000468286	0.00246303	-4.09931e-08	0.000486313	4.58049e-10
2021-09-30	9	Blank	7.06359e-09	2.45131e-05	0.130021	0.0620201	0.0202318	0.105233	-0.804143	0.000940505	0.115849	6.55254e-10	0.000330671	3.96872e-10
2021-09-30	10	EPF04	-5.58164e-07			3.07173	0.0042394	0.00522628	-0.426059	0.000379826	0.00513913	1.1888e-07	0.00487171	5.69964e-10
2021-09-30	11	EPF05	-6.31519e-07			3.32868	0.00345262	0.00372439	-0.485896	0.000257592	0.00384627	1.40474e-07	0.0053199	9.47299e-10
2021-09-30	12	EPF09	3.7406e-08			0.732769	0.00416303	0.00876765	-0.106962	0.000284068	0.00375266	9.46037e-08	0.00134095	2.32787e-10
2021-09-30	13	EPF10	-1.45792e-09			0.44031	0.0148231	0.0324621	-0.383119	0.00540386	0.00811926	4.74526e-08	0.00151469	3.0716e-10
2021-09-30	14	EPF12	-4.93047e-07			2.75719	0.000808322	0.00208376	-0.400324	0.000231534	0.00297099	1.14723e-07	0.00451814	9.0115e-10
2021-09-30	15	EPF16	0									0		0
2021-09-30	16	EPF19	-5.51868e-07	2.01069e-05	4.29965	3.00549	0.000778188	0.00255125	-0.423531	0.000259849	0.00305815	1.15643e-07	0.00511892	1.01178e-09
2021-09-30	17	EPF21	-5.45747e-07			2.94925	0.00268206	0.00351184	-0.498197	0.000259992	0.00326187	1.37271e-07	0.00496882	1.04489e-09
2021-09-30	18	EPF20	-5.13506e-07			2.88246	0.00176949	0.00200395	-0.406847	0.000229527	0.00280085	1.12551e-07	0.00515205	1.58035e-09
2021-09-30	19	1ppm A	1.29802e-07			0.0953012	0.00276072	0.00317019	-0.0108333	0.000880032	0.00623301	2.05647e-07	0.00129097	8.28379e-10
2021-09-30	20	10ppm A	1.32736e-07	1.75618e-07	0.000963075	0.0964966	0.00210882	0.00166595	0.00209478	0.000755526	0.00398129	2.08732e-07	0.00108446	8.97785e-10
2021-09-30	21	50ppm A	1.33091e-07	1.30723e-07	0.000662241	0.0953997	0.00208507	0.00153387	0.00325056	0.000750734	0.00362973	1.58318e-07	0.00110258	8.51078e-10
2021-09-30	22	A 100ppm	1.3294e-07	1.26642e-07	0.000652325	0.0958428	0.00209757	0.00147146	0.00336706	0.000773015	0.00366585	1.65733e-07	0.00112099	8.20096e-10
2021-09-30	23	B 100 ppm	1.38415e-07	2.85022e-08	0.000297881	0.0222034	0.000567393	0.00129333	8.39531e-05	0.000218322	0.00280818	5.33354e-08	0.000213541	2.34561e-10
2021-09-30	24	C 1000 ppm	-1.21816e-08	6.37711e-08	0.000329505	0.0276155	0.00126242	0.00122695	0.00375261	0.000213151	0.00249042	-2.97379e-08	0.000207625	1.821e-10
2021-09-30	25	D 100 ppm	1.36208e-07	3.14239e-08	0.000443126	0.0488613	0.0006444	0.00135059	0.00378618	0.000465239	0.0024006	-4.09568e-08	0.000480805	4.595e-10
2021-09-28	1	Blank	6.59982e-07	4.57993e-05	1.20702	0.0852822	0.0616356	2.07593	3.65525	0.00160649	0.400945	7.01681e-05	7.01681e-08	0.000109154	1.58129e-07	1.58129e-10
2021-09-28	2	1ppm A	2.88981e-08	5.77109e-07	0.0125653	0.125619	0.00433703	0.0219005	0.0340408	0.00117606	0.00855239	0.000244538	2.44538e-07	0.00185188	1.18811e-06	1.18811e-09
2021-09-28	3	10ppm A	2.10755e-08	2.49611e-07	0.00185321	0.126621	0.00305791	0.00449299	0.00343266	0.000984162	0.00524412	0.000243607	2.43607e-07	0.00152147	1.12006e-06	1.12006e-09
2021-09-28	4	50ppm A	2.20079e-08	1.97841e-07	0.00103438	0.120665	0.00296747	0.00291664	0.000691185	0.00097606	0.00462129	0.000194619	1.94619e-07	0.00147473	1.09149e-06	1.09149e-09
2021-09-28	5	A 100ppm	2.18013e-08	1.98518e-07	0.000921988	0.121502	0.002977	0.0022905	0.000361986	0.00098585	0.00468237	0.000197865	1.97865e-07	0.0014842	9.72884e-07	9.72884e-10
2021-09-28	6	B 100 ppm	2.24747e-09	3.40201e-09	0.000140533	0.000176017	5.26749e-05	0.000730733	0.0093582	1.26965e-05	0.00324115	0.000103304	1.03304e-07	1.60894e-05	1.02498e-07	1.02498e-10
2021-09-28	7	C 100 ppm	5.93088e-07	9.67212e-08	3.39469e-05	0.0102885	0.00154478	3.95672e-05	-0.000522345	1.4814e-06	0.00252409	1.29745e-05	1.29745e-08	4.14453e-06	9.2547e-09	9.2547e-12
2021-09-28	8	D 100 ppm	1.10239e-08	1.38427e-08	0.000492161	0.0503787	0.000217258	0.00136906	-0.000625753	0.000516139	0.00230174	1.32445e-06	1.32445e-09	0.000515894	4.92092e-07	4.92092e-10
2021-09-28	9	Blank
2021-09-28	10	F02	2.79333e-06			5.51065	0.000415463		1.00894	6.00196e-06	0.00321034	0.000171146	1.71146e-07	0.00887799	1.50267e-06	1.50267e-09
2021-09-28	11	F03	2.74319e-06			5.56168	8.3396e-05		1.03771	5.37107e-06	0.00326645	0.000173135	1.73135e-07	0.00899524	1.56636e-06	1.56636e-09
2021-09-28	12	F04	2.75206e-06			5.42978	0.000131455		1.02072	5.02809e-06	0.00324466	0.000169639	1.69639e-07	0.00896522	1.54177e-06	1.54177e-09
2021-09-28	13	F05	2.77617e-06			5.52625	0.00151399		1.0259	5.88135e-06	0.00327785	0.000174687	1.74687e-07	0.00901695	1.50246e-06	1.50246e-09
2021-09-28	14	F06	2.74587e-06			5.34511	9.39283e-05		1.01727	5.22104e-06	0.00316824	0.000173976	1.73976e-07	0.00887552	1.57597e-06	1.57597e-09
2021-09-28	15	F07	2.7332e-06			5.51873	0.000200016		1.01642	5.71524e-06	0.00315382	0.000174243	1.74243e-07	0.00894363	1.57791e-06	1.57791e-09
2021-09-28	16	EPF04
2021-09-28	17	EPF05
2021-09-28	18	EPF09
2021-09-28	19	EPF10
2021-09-28	20	EPF12
2021-09-28	21	EPF16
2021-09-28	22	EPF19
2021-09-28	23	EPF21
2021-09-28	24	EPF20
2021-09-28	25	Q8	8.56316e-09			0.00159101	0.0017923		0.0122655	2.6737e-05	0.00340407	1.72092e-06	1.72092e-09	0.00342153	1.27439e-08	1.27439e-11
2021-09-28	26	H08	9.50685e-09			0.00724945	0.00125808		0.0100963	8.43138e-06	0.00326239	6.47502e-07	6.47502e-10	0.009531	1.39669e-06	1.39669e-09
2021-09-28	27	H27	1.45722e-08			0.00661705	0.00474191		0.0253856	2.01751e-05	0.00506668	1.41701e-06	1.41701e-09	0.00961996	1.54429e-06	1.54429e-09
2021-09-28	28	1ppm A	2.42554e-08			0.125618	0.00438251		0.0340029	0.00120309	0.00894799	0.000243598	2.43598e-07	0.00186838	1.0762e-06	1.0762e-09
2021-09-28	29	10ppm A	2.24569e-08	2.85437e-07	0.00182305	0.122959	0.00305444	0.00453241	0.00348495	0.000985595	0.00539776	0.000249178	2.49178e-07	0.001468	1.10307e-06	1.10307e-09
2021-09-28	30	50ppm A	2.21411e-08	2.13672e-07	0.00103284	0.122618	0.00304252	0.00306389	0.000743936	0.000988164	0.00473521	0.000198421	1.98421e-07	0.00146062	1.0718e-06	1.0718e-09
2021-09-28	31	A 100ppm	2.15719e-08	2.08351e-07	0.000926762	0.122233	0.00294208	0.00237269	0.000379745	0.000986692	0.00470214	0.000199955	1.99955e-07	0.00143741	9.83607e-07	9.83607e-10
2021-09-28	32	B 100 ppm	2.28729e-09	6.83995e-09	0.000141116	0.000180853	5.5842e-05	0.000762643	0.00956728	1.31014e-05	0.00320427	0.000102245	1.02245e-07	1.67167e-05	9.86094e-08	9.86094e-11
2021-09-28	33	C 1000 ppm	5.99971e-07	1.00709e-07	3.0371e-05	0.0102327	0.00155841	4.77891e-05	-0.000509112	1.52064e-06	0.00250052	1.31533e-05	1.31533e-08	4.22536e-06	8.97577e-09	8.97577e-12
2021-09-28	34	D 100 ppm	1.15177e-08	1.6161e-08	0.000485566	0.0506318	0.000212396	0.00151509	-0.00060909	0.000515758	0.0022791	1.34939e-06	1.34939e-09	0.000502585	4.79455e-07	4.79455e-10

[truncated: 2 more sheets: BCa Comparison, Princeton trace elements]
