# Supplementary material for: Magnesium (Mg∕Ca, δ 26 Mg), boron (B∕Ca, δ 11 B), and calcium (Ca 2+ ) geochemistry of Arctica islandica and Crassostrea virginica extrapallial fluid and shell under ocean acidification
Source: Copernicus journal article supplement (doi:10.5194/bg-22-2831-2025), 2025-06-19
Supplement: Supplementary file 1 [file bg-22-2831-2025-supplement.zip]

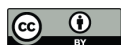

*Supplement of*

**Magnesium (Mg / Ca,  $\delta^{26}\text{Mg}$ ), boron (B / Ca,  $\delta^{11}\text{B}$ ), and calcium ( $\text{Ca}^{2+}$ ) geochemistry of *Arctica islandica* and *Crassostrea virginica* extrapallial fluid and shell under ocean acidification**

**Blanca Alvarez Caraveo et al.**

*Correspondence to:* Blanca Alvarez Caraveo (alvarezblanca@g.ucla.edu) and Robert A. Eagle (robeagle@ucla.edu)

- bg-22-2831-2025-supplement-title-page.pdf
- BGS\_Submission\_EPF\_metadata\_complete.xlsx

The copyright of individual parts of the supplement might differ from the article licence.
